# Supplementary material
Source: PubMed Central journal article supplement (PMC4390273)
Supplement: supp_M114.045260_mcp.M114.045260-1.pdf [file supp_M114.045260_mcp.M114.045260-1.pdf]

## **Supplementary Figure Legends**

### **Supplementary Figure 1: Chromatographic profile of QconCAT peptides**

eQ1 & eQ2: Chromatogram of SRM transitions with corresponding peptide labeled with gene name in the QconCAT protein sequence below.

### **Supplementary Table 1: Global proteomics of Native and Decellularized Lungs**

LC-MS/MS results of two native and two decellularized lungs. Each lung was processed into five fractions as outlined in Figure 1. Each fraction was run in analytical triplicate with the normalized values reported as peptide spectral matches, number of unique peptides, percent protein coverage, and total ion current. Protein level comparison are made between fractions using PSM results.

### **Supplementary Table 2: SRM parameters for QconCAT peptides**

QconCAT peptides with gene name, retention time, Precursor ion, and corresponding transitions and optimized collision energy. Species specificity is included for each peptide. A note was included for those standard peptides that do not meet quality control criteria.

### **Supplementary Table 3: Absolute quantification of forty-nine cellular and ECM proteins in Native and Decellularized Lung**

Quantitative analysis of lung tissue for both native and decellularized lungs. Total  $\mu\text{g}$  quantities for proteins are representative of the left lobe of a single lung, and normalized to the average dry weight of Native (58.1 $\mu\text{g}$ s) and Decellularized (20.1 $\mu\text{g}$ s)

\* Two different QconCAT peptides were used to quantify the protein.

<sup>†</sup> One of the two QconCAT peptides representing the protein of interest did not meet QC specs due to ion suppression.

‡ Standard Error of the Mean calculated with an n=6 for peptides (Biological duplicate, Technical Triplicate), with the exception of those with two QconCAT peptides, where n=12 (Biological duplicate, Technical duplicate for number of reporter peptides representing a single protein, Technical triplicate at the instrument level).

# Supplemental Figure 1

eQ1: 43,900 Da

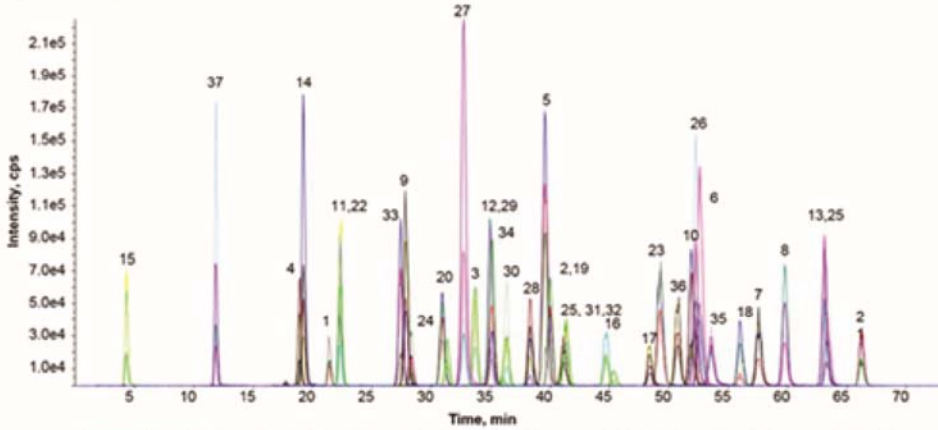

MKEGHHHHHGRQLAEEDLAQRDLYLENPEIKYALSNSIGPVRSGYEFADDRSTFDLLRLTAFGGFLKDDAWDLLRD  
 PLEC TGM2 NID1 NID2 LAMA1 LAMA1 LAMA2  
 1 2 3 4 5 6 7  
 LADLAAYTALKISGVIGPYRLQLLEDLERAAQLDGLLEARALVEGGGILSRLSAEDLVLEGAGLRGFSGLDGAKGPAGPQ  
 LAMA5 LAMB1 LAMB1 LAMB2 LAMB2 LAMC1 COL1A1 COL1A1  
 8 9 10 11 12 13 14 15  
 GPREMATQLAFMRILYHGYSLLYVQGNERSVSIgyLLVklQDLYSIVRVIVVITDGRlTLyTLLEGRGYILQEDGRlle  
 COL2A1 COL4A1 COL4A2 COL18A1 COL14A1 COL7A1 FBN1 LAMA5  
 16 17 18 19 20 21 22 23  
 IVQAVSRGFVYKPDlKGYILQEDGRLEILEELVKYELGSGlAVLREAlVTDLPGRTPVLSAETFTGKGPSSGLLYNGQ  
 FBN1 FBN1 TNXB HSPG2 TNXB TNC AGRN  
 24 22 25 26 27 28 29  
 KIALVITDGRNFVINVNRVAVVITDGRALEFVARLSQYLGTIAERDIDDELTlAKDLSSVQTLlTKYVVDTSKGRGRPGP  
 COL6A1 COL6A2 COL6A2 COL6A3 COL6A5 MYH SPT ADH\_Y  
 30 31 32 33 34 35 36 37

eQ2: 47,942 Da

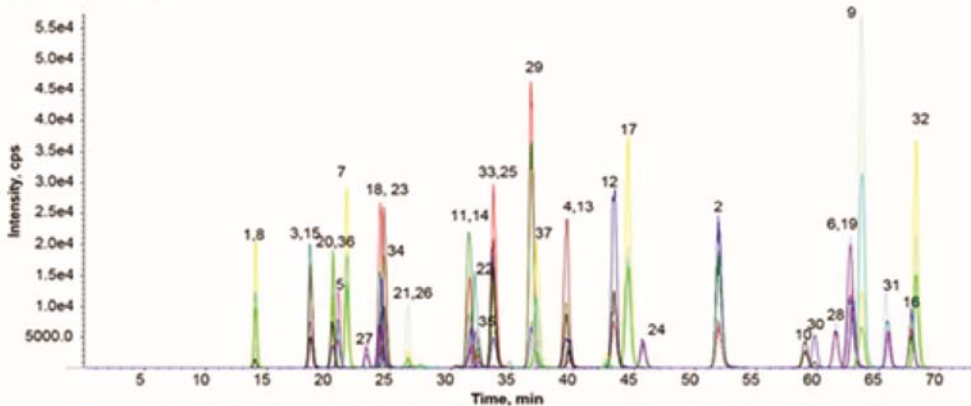

MKAGFAGDDAPRYLTVAAVFRtSGGAGlGSlRPTGLQYLNNANTFISpQRAAAITSDLESIGRFADLSEA  
 ACTA1 TUBB DES LUM MGP POSTN VIM  
 1 2 3 4 5 6 7  
 ANRINQTYQQYGRASGIELFAIGVGRQGEALNlLETGYSRAGHIYVSGSAPSFPRYALlGYNAAYNRTSYTAVSLYS  
 ANXA4 MATN ECM1 VTN MGP DCN  
 8 9 10 11 12 13  
 NPVrvGIVFTDGRSAyLARGVDEVTlVNIlTNRlQDLYSIVRGDSLAYGLRlDQPFtIlFRlSQNLlSRSLYSSSPGG  
 MATN OGN ANXA2 COL18A1 SPP1 FBN5 PRELP VIM  
 14 15 16 17 18 19 20 21  
 AYVTRGInQQVWlGGRAgNTQGDfYIRDLlTVDSRYFESVLDRCsNNGlVAGFQSRNGAIHlFRDFPNlAFIRlDTV  
 PRG2 EFEMP2 EMP1 DPT DPT POSTN PRELP EMILIN1  
 22 23 24 25 26 27 28 29  
 AGGLQGLRGLLVEPAANSYLLAERGLlGTlNNDNPEDDFTlRlQAlELEDlLRTGYYFDGI SRHLQlAlRVAVNDVHLLQ  
 TG2 SUSD2 BGN FBN1 H2A LGALS3  
 30 31 32 33 34 35  
 YNHRGYSPTTtAERlSIVGSYVGNRGSEFELVDKlAAALEHHHHHHH  
 ACTB ADH\_Y  
 36 37
