# Supplementary material
Source: PubMed Central journal article supplement (PMC4390273)
Supplement: supp_M114.045260_mcp.M114.045260-4.pdf [file supp_M114.045260_mcp.M114.045260-4.pdf]

**Supplementary Table 3: Absolute Quantification of forty-nine cellular and ECM proteins in Native and Decellularized Lung**

| Protein                                 | Gene             | Classification | Native nmol/g                                            | Native ugs | Native SEM (%) <sup>‡</sup> | Decel nmol/g | Decel ugs | Decel SEM (%) <sup>‡</sup> | % Retained |  |
|-----------------------------------------|------------------|----------------|----------------------------------------------------------|------------|-----------------------------|--------------|-----------|----------------------------|------------|--|
| Annexin A2                              | ANXA2            | Cellular       | 17.652                                                   | 39.73      | 9.20                        | 0.481        | 0.37      | 4.40                       | 0.94%      |  |
| Annexin A4                              | ANXA4            | Cellular       | 4.551                                                    | 9.49       | 10.77                       | 0.053        | 0.04      | 11.85                      | 0.40%      |  |
| Sushi-domain containing Protein 2       | SUSD2            | Cellular       | 0.635                                                    | 3.34       | 11.47                       | 0.040        | 0.07      | 8.45                       | 2.16%      |  |
| Actin Alpha Skeletal Muscle             | ACTA1            | Cellular       | 142.765                                                  | 349.34     | 10.23                       | 3.188        | 2.70      | 12.49                      | 0.77%      |  |
| Actin, cytoplasmic 1                    | ACTB             | Cellular       | 165.714                                                  | 402.47     | 10.98                       | 3.258        | 2.74      | 5.45                       | 0.68%      |  |
| Myosin3                                 | MYH              | Cellular       | 0.958                                                    | 12.42      | 17.66                       | 0.113        | 0.51      | 10.38                      | 4.07%      |  |
| Vimentin                                | VIM*             | Cellular       | 11.132                                                   | 34.81      | 13.19                       | 0.496        | 0.54      | 20.81                      | 1.54%      |  |
| Desmin                                  | DES              | Cellular       | 1.429                                                    | 4.44       | 2.31                        | 0.185        | 0.20      | 7.24                       | 4.49%      |  |
| Plectin                                 | PLEC             | Cellular       | 0.317                                                    | 9.84       | 9.70                        | 0.038        | 0.41      | 7.70                       | 4.12%      |  |
| Spectrin alpha chain, isoform 2         | SPTA2            | Cellular       | 1.298                                                    | 21.50      | 11.00                       | 0.024        | 0.14      | 6.61                       | 0.63%      |  |
| Tubulin beta-4B chain                   | TUBB             | Cellular       | 30.768                                                   | 88.78      | 10.80                       | 0.972        | 0.97      | 3.34                       | 1.10%      |  |
| Histone 2A                              | H2A              | Cellular       | 123.004                                                  | 100.76     | 8.47                        | 3.949        | 1.12      | 4.85                       | 1.11%      |  |
| Collagen alpha-1(I) chain               | COL1A1*          | Collagens      | 2.312                                                    | 18.56      | 8.39                        | 7.600        | 21.15     | 14.16                      | 113.96%    |  |
| Collagen alpha-1(IV) chain              | COL4A1           | Collagens      | 1.474                                                    | 13.77      | 7.38                        | 1.346        | 4.36      | 1.64                       | 31.65%     |  |
| Collagen alpha-2(IV) chain              | COL4A2           | Collagens      | 1.075                                                    | 10.09      | 5.67                        | 1.666        | 5.42      | 2.90                       | 53.73%     |  |
| Collagen alpha-1(VI) chain              | COL6A1           | Collagens      | 14.206                                                   | 89.94      | 3.03                        | 17.149       | 37.64     | 8.16                       | 41.84%     |  |
| Collagen alpha-2(VI) chain              | COL6A2*          | Collagens      | 13.780                                                   | 87.06      | 4.99                        | 15.898       | 34.82     | 6.90                       | 39.99%     |  |
| Collagen alpha-3(VI) chain              | COL6A3           | Collagens      | 3.189                                                    | 53.47      | 2.99                        | 3.340        | 19.41     | 6.41                       | 36.30%     |  |
| Collagen alpha-5(VI) chain              | COL6A5           | Collagens      | 0.367                                                    | 6.19       | 10.29                       | 0.247        | 1.44      | 2.15                       | 23.30%     |  |
| Collagen alpha-1(VII) chain             | COL7A1           | Collagens      | 0.080                                                    | 1.38       | 15.90                       | 0.052        | 0.31      | 23.64                      | 22.50%     |  |
| Collagen alpha-1(XIV) chain             | COL14A1          | Collagens      | 0.206                                                    | 2.30       | 13.19                       | 0.099        | 0.38      | 16.07                      | 16.63%     |  |
| Collagen alpha-1(XVIII) chain           | COL18A1          | Collagens      | 0.283                                                    | 3.01       | 6.67                        | 0.059        | 0.22      | 8.26                       | 7.17%      |  |
| Laminin subunit alpha-2                 | LAMA2            | Glycoprotein   | 0.104                                                    | 2.05       | 10.34                       | 0.014        | 0.10      | 8.06                       | 4.76%      |  |
| Laminin subunit alpha-5                 | LAMA5*           | Glycoprotein   | 0.577                                                    | 13.59      | 5.10                        | 0.390        | 3.18      | 9.49                       | 23.40%     |  |
| Laminin subunit Beta-1                  | LAMB1*           | Glycoprotein   | 0.217                                                    | 2.49       | 10.20                       | 0.045        | 0.18      | 12.53                      | 7.27%      |  |
| Laminin subunit Beta-2                  | LAMB2*           | Glycoprotein   | 0.578                                                    | 6.61       | 7.75                        | 0.309        | 1.23      | 5.17                       | 18.54%     |  |
| Laminin subunit gamma-1                 | LAMC1            | Glycoprotein   | 0.941                                                    | 9.71       | 5.58                        | 0.330        | 1.18      | 11.61                      | 12.15%     |  |
| Dermatopontin                           | DPT <sup>‡</sup> | Glycoprotein   | 0.827                                                    | 1.16       | 16.35                       | 0.098        | 0.05      | 10.76                      | 4.11%      |  |
| Extracellular Matrix Protein 1          | ECM1*            | Glycoprotein   | 0.497                                                    | 1.83       | 14.74                       | 0.044        | 0.06      | 12.74                      | 3.09%      |  |
| EGF-containing Fibulin like ECM Protein | EFEMP2           | Glycoprotein   | 0.337                                                    | 0.97       | 13.16                       | 0.043        | 0.04      | 8.51                       | 4.43%      |  |
| Emilin-1                                | EMILIN1          | Glycoprotein   | 0.570                                                    | 3.54       | 5.81                        | 0.230        | 0.50      | 4.62                       | 14.02%     |  |
| Fibulin-1                               | FBLN1            | Glycoprotein   | 0.313                                                    | 1.37       | 18.30                       | 0.030        | 0.05      | 10.96                      | 3.36%      |  |
| Fibulin-5                               | FBLN5            | Glycoprotein   | 3.095                                                    | 9.03       | 0.97                        | 0.189        | 0.19      | 1.76                       | 2.12%      |  |
| Fibrillin-1                             | FBN1*            | Glycoprotein   | 0.867                                                    | 15.74      | 8.75                        | 0.152        | 0.95      | 14.26                      | 6.07%      |  |
| Matrix Gla protein                      | MGP <sup>‡</sup> | Glycoprotein   | 0.569                                                    | 0.40       | 9.45                        | 0.213        | 0.05      | 20.08                      | 12.96%     |  |
| Nidogen-1                               | NID1             | Glycoprotein   | 0.136                                                    | 1.08       | 25.45                       | 0.035        | 0.10      | 3.26                       | 8.83%      |  |
| Nidogen-2                               | NID2             | Glycoprotein   | 0.204                                                    | 1.81       | 18.73                       | 0.028        | 0.09      | 13.10                      | 4.69%      |  |
| Periostin                               | POSTN*           | Glycoprotein   | 4.739                                                    | 25.69      | 14.87                       | 0.232        | 0.44      | 9.15                       | 1.70%      |  |
| Tenascin C                              | TNC              | Glycoprotein   | 0.119                                                    | 1.53       | 13.05                       | 0.038        | 0.17      | 30.61                      | 11.22%     |  |
| Tenascin X                              | TNXB*            | Glycoprotein   | 0.123                                                    | 3.31       | 14.62                       | 0.024        | 0.22      | 25.92                      | 6.78%      |  |
| Biglycan                                | BGN              | Proteoglycan   | 1.315                                                    | 3.19       | 6.99                        | 0.082        | 0.07      | 1.00                       | 2.17%      |  |
| Decorin                                 | DCN              | Proteoglycan   | 3.389                                                    | 7.85       | 4.19                        | 0.130        | 0.10      | 12.24                      | 1.33%      |  |
| Perlecan                                | HSPG2            | Proteoglycan   | 0.416                                                    | 9.08       | 2.63                        | 0.168        | 1.27      | 2.12                       | 14.00%     |  |
| Lumican                                 | LUM              | Proteoglycan   | 5.216                                                    | 11.62      | 7.72                        | 0.182        | 0.14      | 4.67                       | 1.21%      |  |
| Osteoglycin                             | OGN              | Proteoglycan   | 3.265                                                    | 6.47       | 5.54                        | 0.752        | 0.52      | 3.35                       | 7.98%      |  |
| Prolargin                               | PRELP*           | Proteoglycan   | 1.949                                                    | 4.90       | 10.80                       | 0.117        | 0.10      | 11.58                      | 2.08%      |  |
| Bone Marrow Proteoglycan                | PRG2             | Proteoglycan   | 1.149                                                    | 1.68       | 8.77                        | 0.188        | 0.10      | 19.16                      | 5.69%      |  |
| Osteopontin                             | SPP1             | Proteoglycan   | 0.180                                                    | 0.37       | 10.44                       | 0.025        | 0.02      | 8.41                       | 4.85%      |  |
| Transglutaminase 2                      | TGM2*            | ECM Regulator  | 2.118                                                    | 9.50       | 8.89                        | 0.059        | 0.09      | 6.24                       | 0.96%      |  |
| Agrin                                   | AGN              | GlycoProtein   | <i>Below the Limit of Quantification</i>                 |            |                             |              |           |                            |            |  |
| Collagen alpha-1(II) chain              | COL2A1           | Collagens      | <i>Poor standard peptide, subject to ion suppression</i> |            |                             |              |           |                            |            |  |
| Galectin-3                              | LGALS3           | ECM Associated | <i>Poor standard peptide, subject to ion suppression</i> |            |                             |              |           |                            |            |  |
| Laminin subunit alpha-1                 | LAMA1            | GlycoProtein   | <i>Below the Limit of Quantification</i>                 |            |                             |              |           |                            |            |  |
| Matrilin-1                              | MATN1            | GlycoProtein   | <i>Below the Limit of Quantification</i>                 |            |                             |              |           |                            |            |  |
| Vitronectin                             | VTN              | GlycoProtein   | <i>Poor standard peptide, subject to ion suppression</i> |            |                             |              |           |                            |            |  |
